# Supplementary material
Source: publisher site journal article supplement (https://www.dovepress.com/article/408595)
Supplement: Supplementary file 1 [file get_supplementary_file.php]

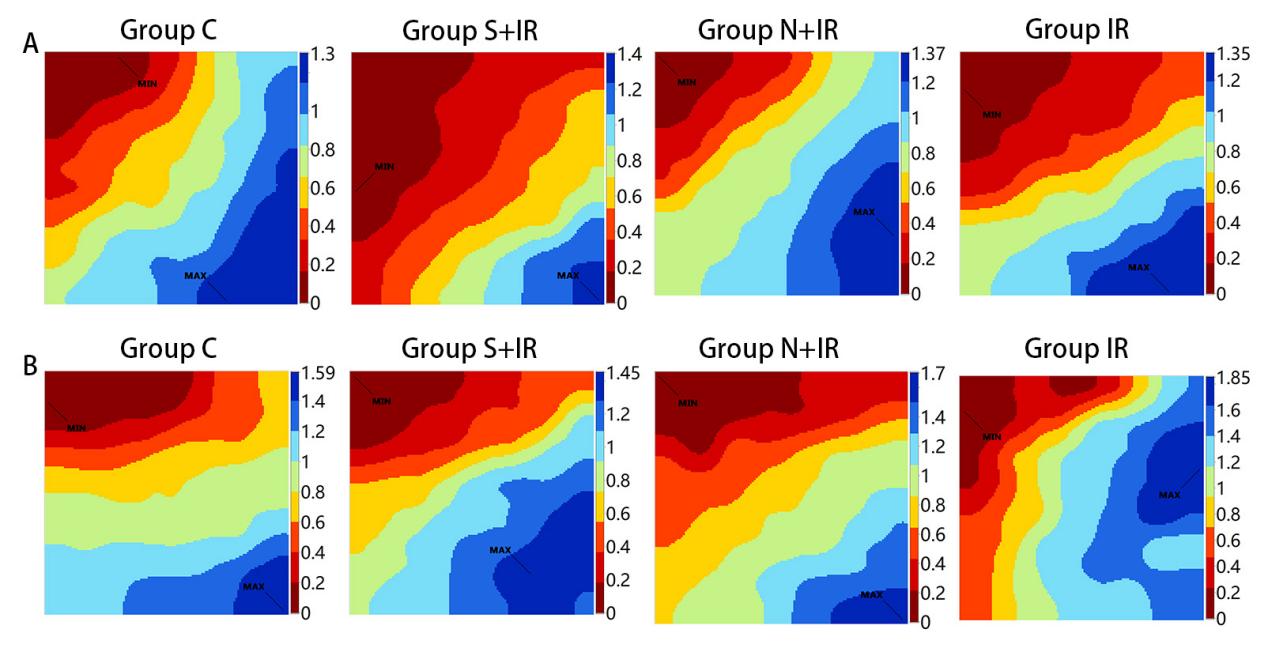
**Supplementary Figure 1** Classic activation maps were obtained in the four groups at T1 (A) and T3 (B).


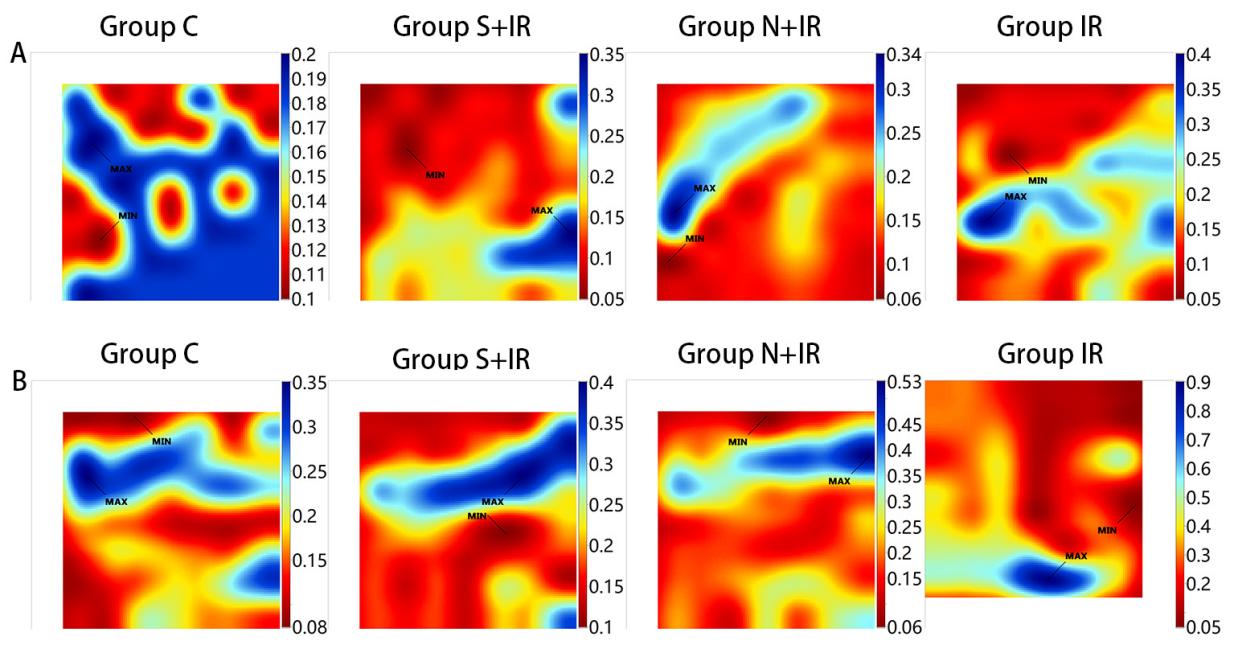


**Supplementary Figure 2** Representative inhomogeneity maps were acquired in the four groups at T1 (A) and T3 (B).
